# Supplementary material for: Stability and Hydrocarbon/Fluorocarbon Sorption of a Metal-Organic Framework with Fluorinated Channels
Source: PubMed Central journal article supplement (PMC5503081; doi:10.3390/ma9050327), 2016-04-29
Supplement: materials-09-00327-s001.pdf [file materials-09-00327-s001.pdf]

# Supplementary Materials: Stability and Hydrocarbon/Fluorocarbon Sorption of a Metal-Organic Framework with Fluorinated Channels

Jijiang Xie, Fuxing Sun, Chunrui Wang and Qikun Pan

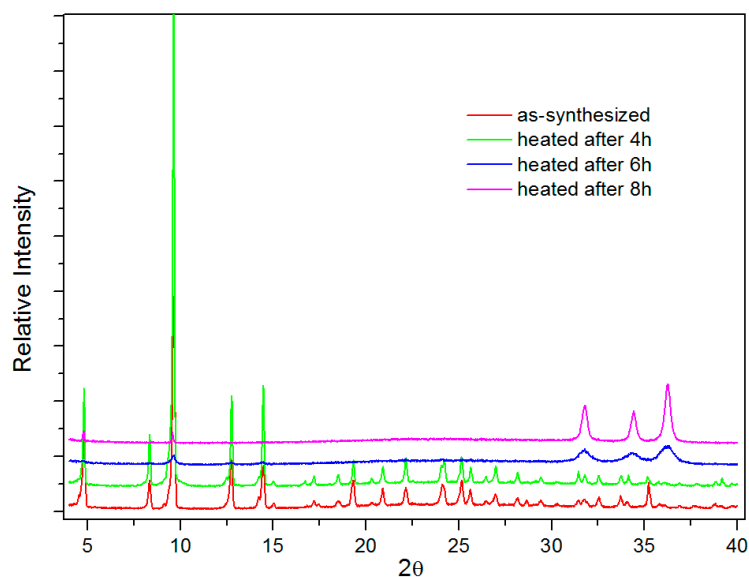

Figure S1. PXRD patterns of Zn(hfipbb) after heated to 400 °C in air.

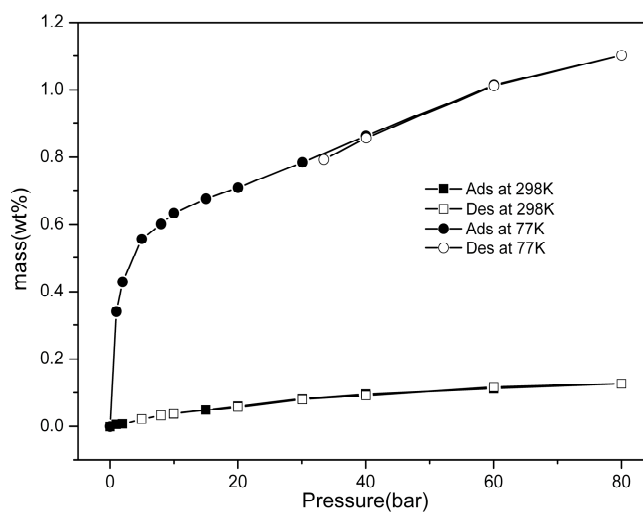

Figure S2. Hydrogen adsorption isotherms of Zn(hfipbb) at 77 K and 298 K.

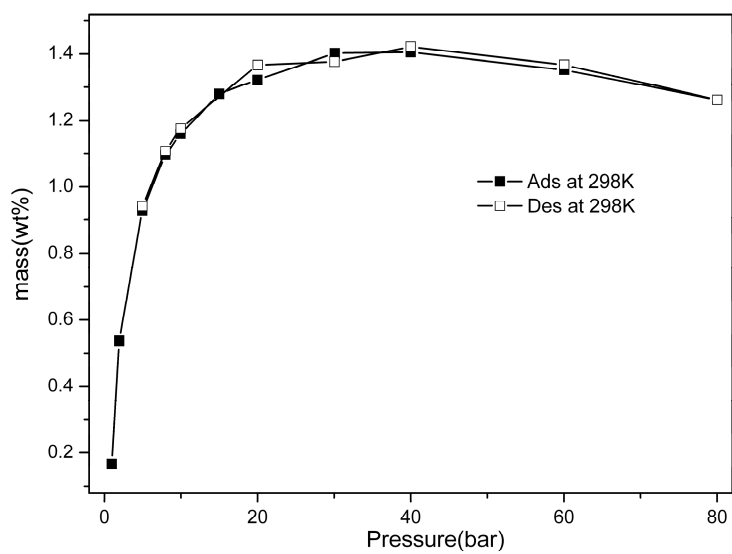

Figure S3. Methane adsorption isotherm of Zn(hfipbb) at 298 K.
